# Supplementary material
Source: HighWire-hosted journal article supplement (http://www.ajnr.org/highwire/filestream/52678/field_highwire_adjunct_files/0/14-00927.pdf)
Supplement: 14-00927.pdf [file 14-00927.pdf]

**On-line Table: Baseline characteristics and risk factors of patients who were and those who were not enrolled in the study<sup>a</sup>**

| Characteristic           | Patients with DLB |                       | P    | Patients with PDD |                       | P    |
|--------------------------|-------------------|-----------------------|------|-------------------|-----------------------|------|
|                          | Enrolled (n = 42) | Not Enrolled (n = 25) |      | Enrolled (n = 88) | Not Enrolled (n = 44) |      |
| Sociodemographics        |                   |                       |      |                   |                       |      |
| Age, y                   | 75.1 ± 6.1        | 74.4 ± 4.9            | .53  | 73.7 ± 7          | 71.9 ± 5.3            | .112 |
| Sex, male                | 18 (42.9)         | 11 (44)               | .927 | 32 (36.4)         | 20 (45.5)             | .379 |
| Risk factors             |                   |                       |      |                   |                       |      |
| Hypertension             | 25 (59.5)         | 13 (52)               | .548 | 41 (46.6)         | 19 (43.2)             | .711 |
| Diabetes mellitus        | 16 (38.1)         | 6 (24)                | .235 | 18 (20.5)         | 10 (22.7)             | .763 |
| Cigarette smoking        | 4 (9.5)           | 3 (12)                | .749 | 12 (13.8)         | 9 (20.5)              | .326 |
| Total cholesterol, mg/dL | 160.7 ± 30.3      | 171.5 ± 26.5          | .147 | 175.6 ± 38.3      | 166.4 ± 41.2          | .214 |
| K-MMSE score             | 19.1 ± 5.1        | 19.7 ± 6              | .659 | 20.3 ± 4.5        | 21 ± 3.5              | .341 |
| UPDRS-III score          | 29.2 ± 13.7       | 23.3 ± 14.3           | .196 | 28.8 ± 15.1       | 26.4 ± 11.5           | .446 |

**Note:**—K-MMSE indicates Korean Mini-Mental State Examination; UPDRS-III, Unified Parkinson's Disease Rating Scale Part III.

<sup>a</sup> Values are expressed as number (%) of subjects or mean ± SD.
